# Supplementary material for: DJ-1 (Park7) affects the gut microbiome, metabolites and development of Innate Lymphoid cells (ILCs)
Source: bioRxiv or medRxiv preprint supplement (doi:10.1101/776005), 2019-09-19

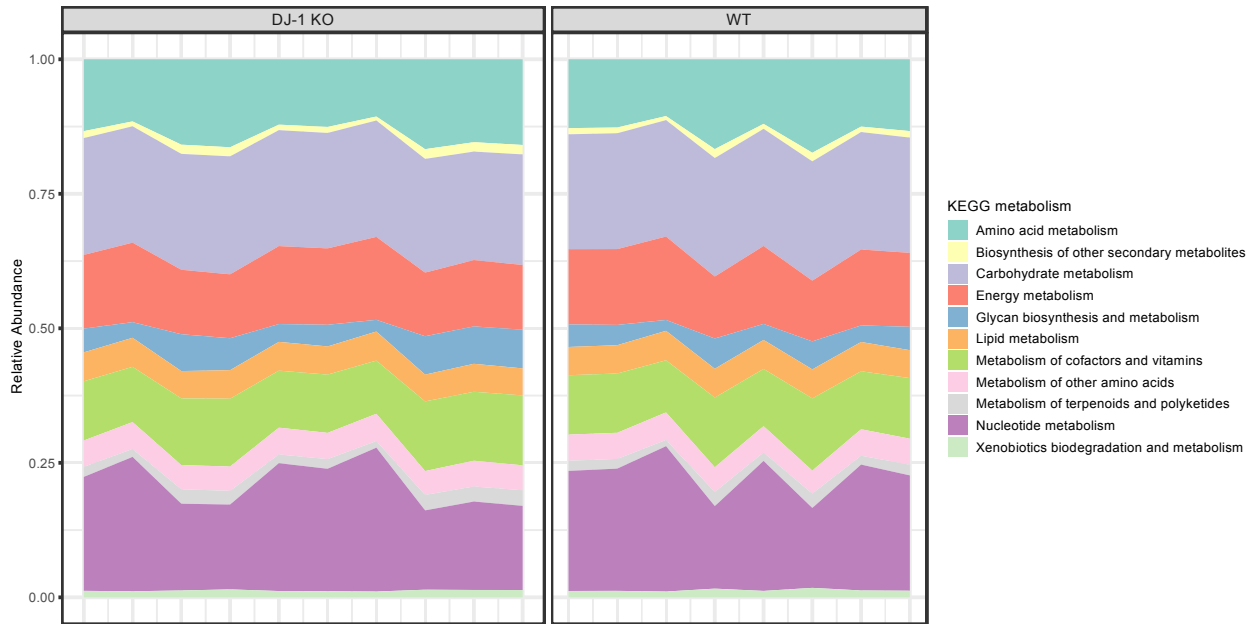

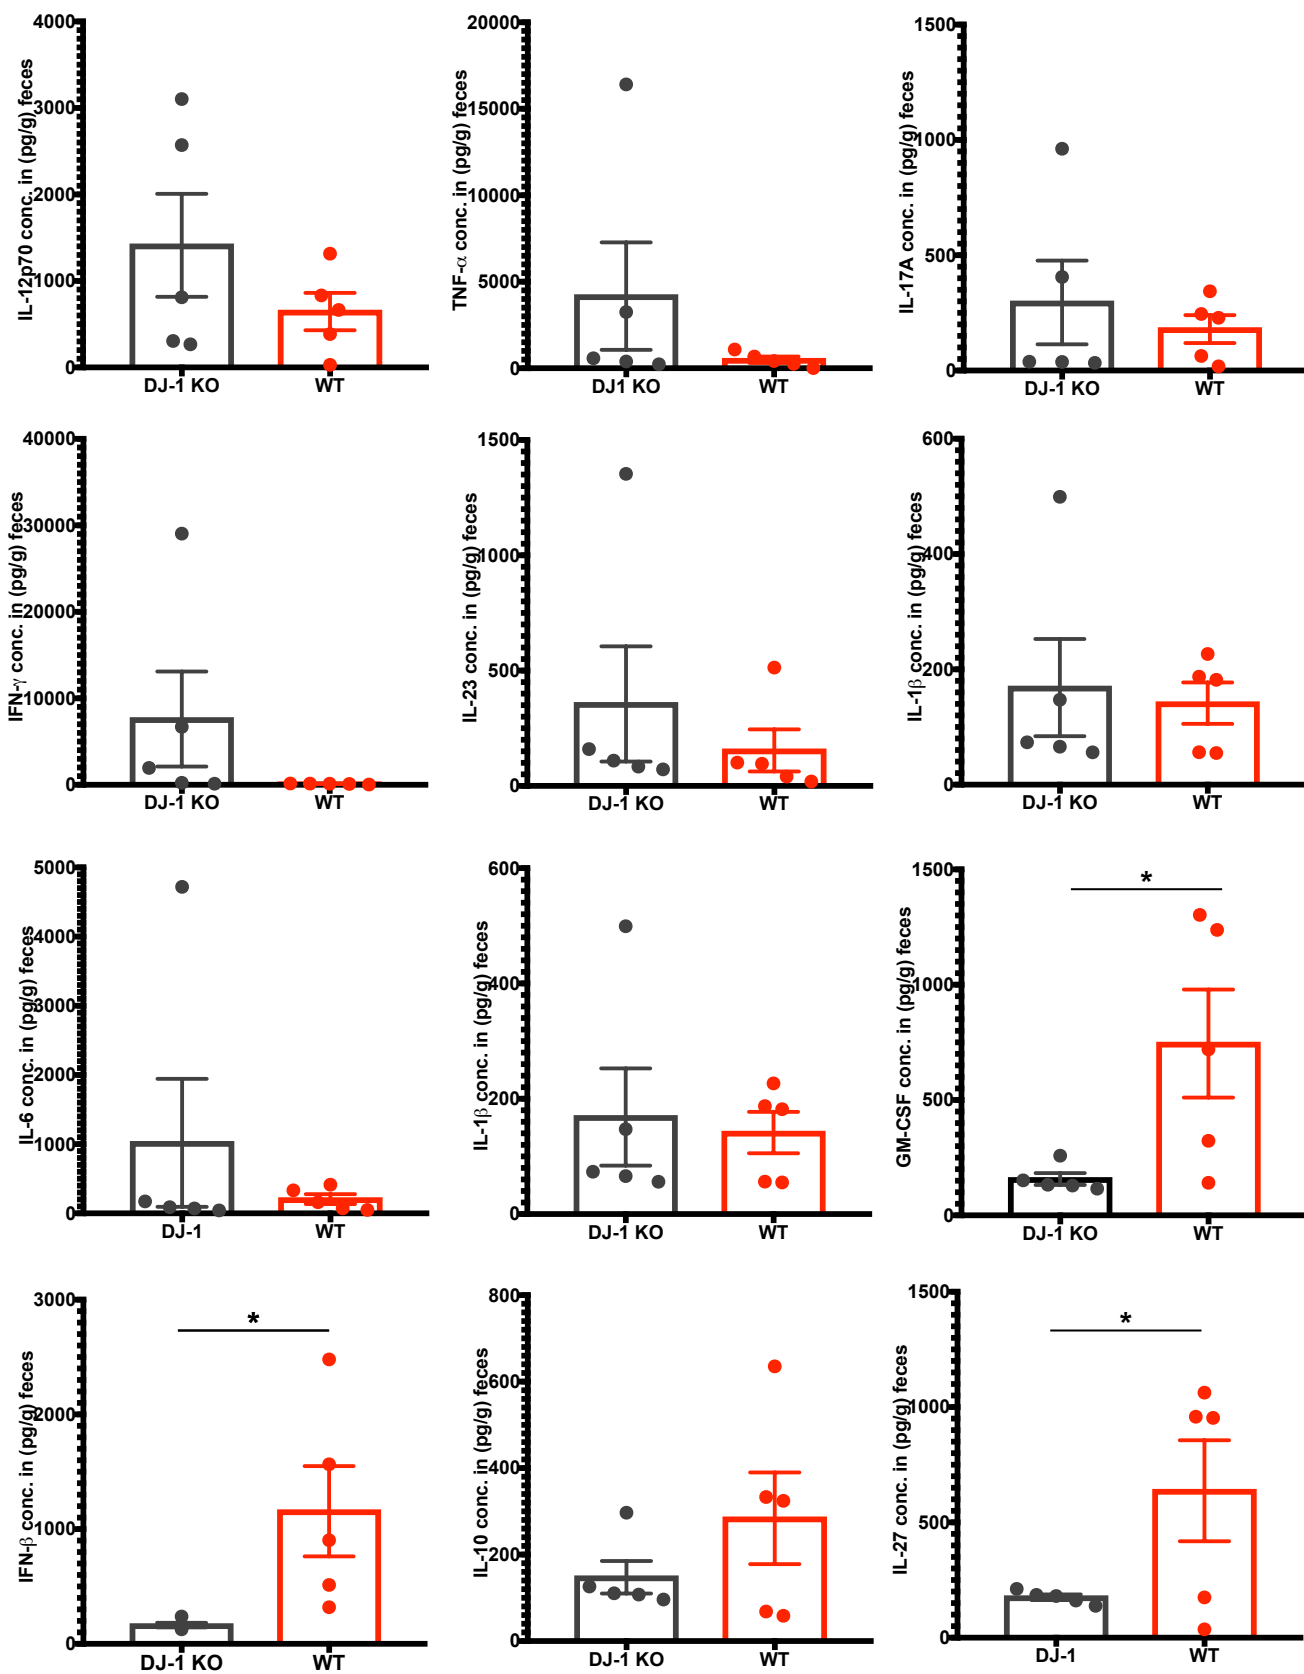

Suppl. Fig. 2

a

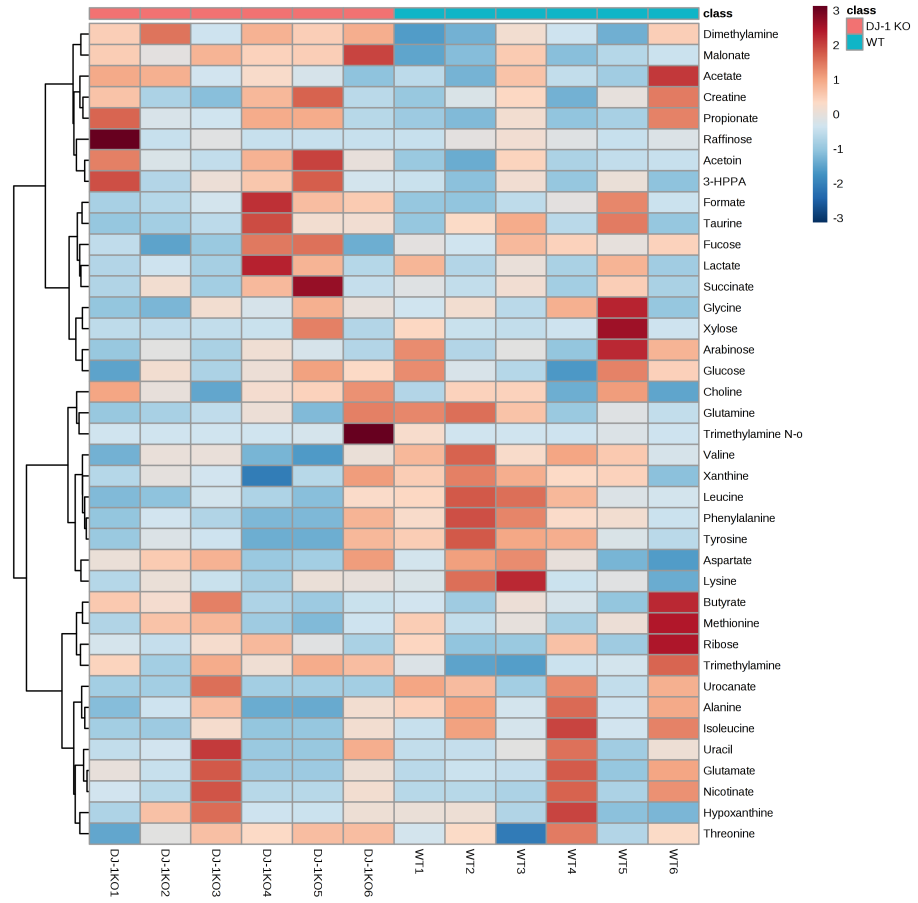

b

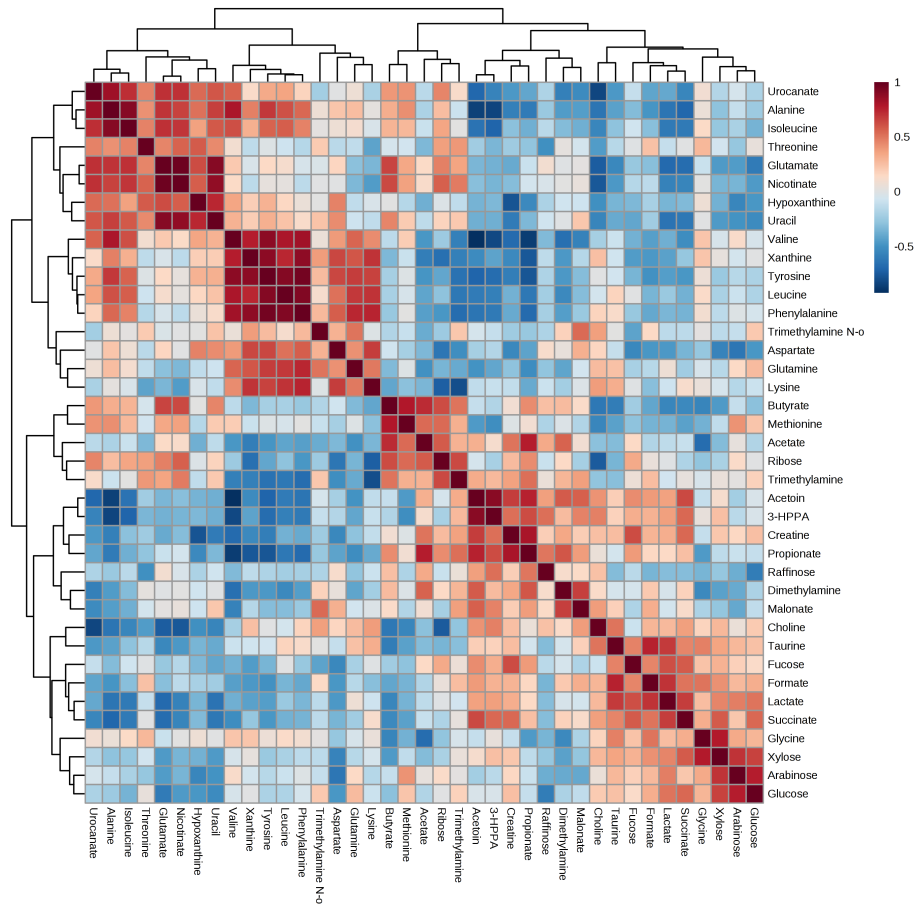

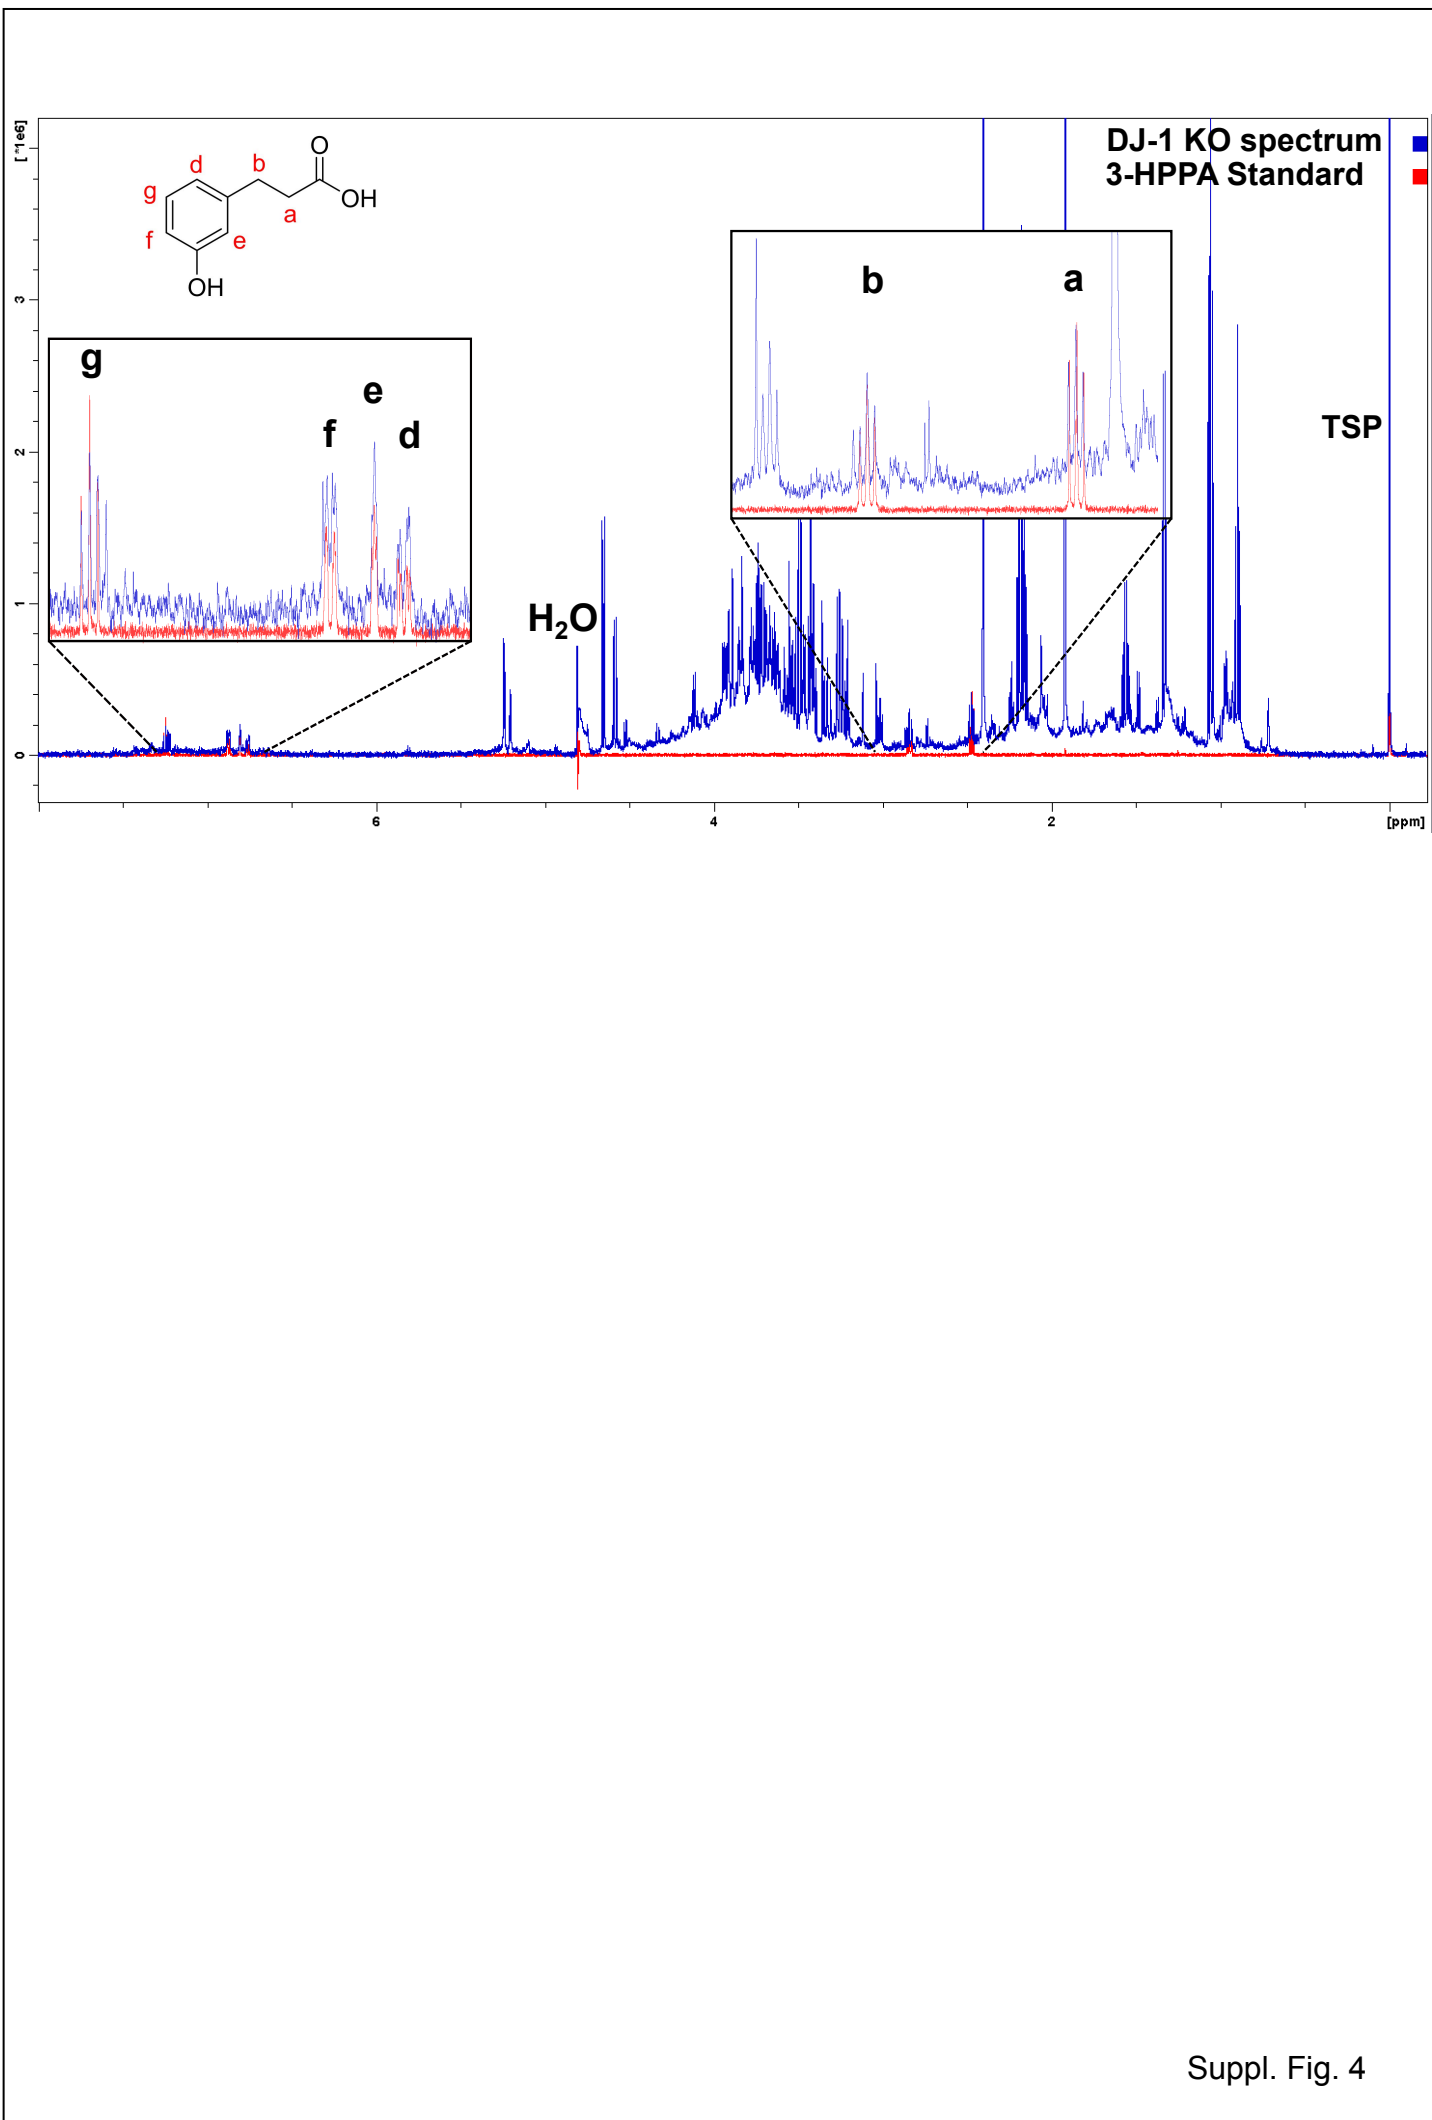

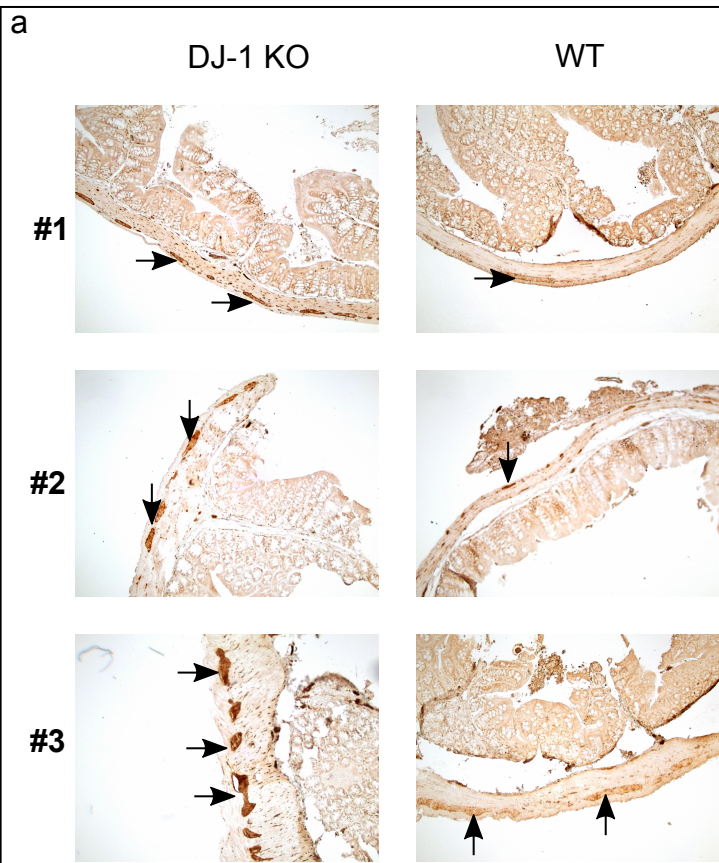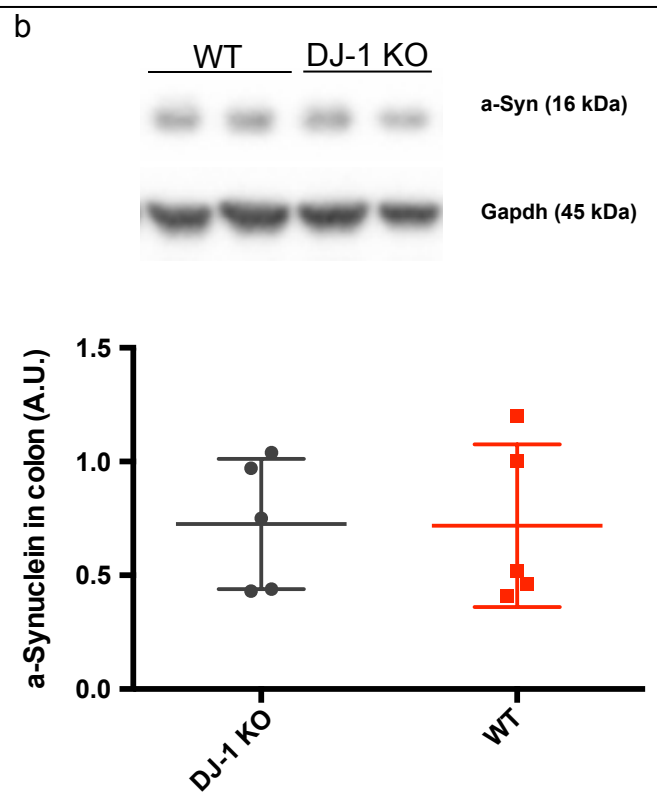

Supplement: Supplementary file [file media-1.pdf]
